# Supplementary material for: Recovery of consciousness and cognition after general anesthesia in humans
Source: eLife. 2021 May 10;10:e59525. doi: 10.7554/eLife.59525 (PMC8163502; doi:10.7554/eLife.59525)
Supplement: Figure 5—source data 1. [file elife-59525-fig5-data1.xlsx]

## Sheet: Actigraphy Timeline -3d to +4d 
Time (hours)	Control	Control	Control	Control	Control	Control	Control	Control	Control	Control	Control	Control	Control	Control	Control	Control	Control	Control	Control	Control	Control	Control	Control	Control	Control	Control	Control	Control	Control	Control	Anesthesia	Anesthesia	Anesthesia	Anesthesia	Anesthesia	Anesthesia	Anesthesia	Anesthesia	Anesthesia	Anesthesia	Anesthesia	Anesthesia	Anesthesia	Anesthesia	Anesthesia	Anesthesia	Anesthesia	Anesthesia	Anesthesia
-72	20			7	19	40		52	51		0	0	28	52		58	0	5		42	0	52	59		41	59	10	57	8	60	53	10	59		39	5	45	16	48	55	58	53		0	55	41	25	53	59
-71	14			2	42	52	4	44	58		4	0	38	44		50	35	17			4	53	51		57	59	44	59	42	58	60	41		60	54	23		39	59	57	58			0	59	60	60	58	59
-70	2			56	40	57	50	37	51		41		60	59		59	58	28			48	60			54	47	9	57	57	48	58	27		49	48	50		38	56	58	59			0	58	60	52	59	60
-69	57			60	58	59	53	44	60				54	52		55	58	44		58		60			58	57	59		45	46	50	27		56	57	49	40	50	58	51	57			49	52	60	58	40	59
-68	42			58	53	59	57	55	55				58	52		54	55	60		60		59	57		52		45		36	51	54	56	49	35	51	56	51	48	60	58	53				59	60	60	49	56
-67	60			59	48	60	49	21	58		48	57	59	52		59	55			51	56	59	58		47	52	53	56	55	58	52	56	33	10	58	58	39	44	56	45	40	44			60	57	59	13
-66	56			55	58	59	53	0	32		58	59	48	46		24	58			58	59	60	60		51	55	39	48	52	50	7	45	8	1	49	51	57	0	55	48	25	24		34	34	54	50	6	51
-65	59			59	51	58	55	0	0		40	50	57	20		0	53			43	59	57	58		37	43	53	2		12	10	58	31	1	16	53	12	7	9	45	36	13		59	0	56	54	0
-64	58			33	56	6	57	21	0			21	19	1		12	51	60		25	53	35	36		38	15	51	29		16	29	48	4	1	7	58	9	24	0	5	5	5	0	56	0	54	50	0
-63	59	2	0	0	54	5	34	1	0			18	6	16		1	2	38		19	26	6	26		20	0		10		2	11	8	4	4	0	39	0	23	0	5	13	19	0	57	0		44	0
-62	32	11	14	0	35	2	16	0	0		9	9		21	0	23	42	0		0	0	6	0		5	0		0		0	3	21	11	1	1	31	12	20	1	0	8	25	0	3	1		11	0
-61	26	0	9	0	20	0	1	0	0		0	3		0	0	2	33	0		1	0	0	2		33	1	0	0		12	2	57	1	5	1	0	9	7	0	12	14	6	0	0	0	30	4	0
-60	0	11	13	0	44	0	11	0	2		0	0	11	22	1	0	17	23		10	0	18	16		16	0	0	7		8	2	36	34	13	0	1	11	7	0	8	4	28	0	0	0	24	0	5
-59	10	3	27	4	0	0	2	1	0		0	0	15	51	0	0	5	0		2	0	4	12		0	0	0	1		0	0	8	11	12	3	4	2	12	3	0	0	21	0	0	0	17	0	0
-58	35	0	26	1	17	0	5	9	5		7	0	10	60	0	0	4	29		9	0	15	10		0	2	0	4		0	2	54	6	5	4	30	0	4	2	7	0	11	12	0	0	11	2	1
-57	6	0		0	0	3	0	4	1	0	12	0	14	53	0	0	1	0		3	0	23	20		13	7	0	0		0	11	10	0	15	2	8	1	13	4	3	15	33	1	1	0	13	0	53
-56	35	2		0	2	8	22	5	2	0	51		16	22	12	3	3	0	5	3	10	54	20		57	0		10		20	14	55	0	20	1	0	2	1	3	0		19	0	1	0	10	1	11
-55	0	1	14	0	35	0	0	13	35	0	48		40	8	23	1	0	0	0	15	3	49	3		60	18		9		2	3	16	11	14	0	8	22	0	39	0		27	0	0		3	0	1
-54	45	0	2	0	34	0	0	21	0	0	17		28	0	0	5	0	0	0	17	0	0	5		49	0		0		0	0	13	2	0	0	17	11	0	1	0		46	29	0		14	3	0
-53	21	0	0	1	15	3	0	0	2	0	0	17	2	0	0	7	0	0		23	12	42	1		21	6		1		0	0	19	0	22	4	0	13	7	8	8		54	9	0		0	19	4
-52	8	0	12	3	28	19	0	0	0	1	0	0	27	0	4	19	32	0		11	0	22	8		5	14		0		0	1	25	0	31	0	3	24	47	34			57	27	0		5	22	1
-51	9	7	0	0	2	28	7	3	5	1	0	0	19	0	26	19	37	0		6	2	11	36		29			0		0	39	9	1	13	0	7	14	34	20			34	47	0		2	4	13
-50	16		13	17	5	44	8	0	55	3	5	0	26	4	25	38	6	14	19	9	8	36	3		15			11		0	60	0	8	45	5	6	5	23	19	6		41	21	0		20	21	57
-49	2		24	30	0	59	30	10	60	0	33	0	9	4	49	41	4	36	52	4	7	35	59		24	49		50		47		18	4	51	52	35	21	8	16	43		36	7	6		12	18	57
-48	4		0	27	39	49	60	56	49	4	35	0	40	9		60	17	44		17	2	47	58		33	52		58		58		51	50	14	58	43	4	16	11	51	60	57	51	16		55	44	57
-47	13		10	60	49	58	49	54	59	1	59	0	47	15		59		60		14	16	59	46		33	52		59	57	56	45	56	49	47	42	30		52	31	43	60		59	43		42	56	57	58
-46	34		25	59	56	55	50	48	55	3	58	0	53	56	59	58		59	59		56	55			59	52		55	58	50	38	55	54	53	11	60		54	2	57	57		52	25		60	44	57
-45	59		60	59	49	34	60	48	58	54	48	0	54	59	60	59	56	60	59		58	59			45	54		57	50	51	40	53	52	52	0			56	22		57		58	4		57	56	30
-44	55		60	59	54	3	58	41	51	60	52		55	48	60	58	55	59	52	59		55	60		45	54		60	54	53	58	59	59	60	10	49	47	47	53		60	58	46	0		45	56	1	59
-43	53		45	15	58	0	57	52	59		45		53	50	50	57	58		59	60		58	57		59	54		59	59	56	51	58	44		0	40	56	57	51	58	49	53	59	45		28	43	0	58
-42	57		58	13	39	8	56	9	31		59	58	59	48		33	60		40	60	50	57	59		50	45		45	58	8	57	59	6		48	53	41	60	57	53	59	20	24	56		20	52	0	58
-41	50		48	0	48	1	49	2	8		44	56	52	20		1	53		8	48	51	57	51		57	52		19	49	18		59	24	59	53	56	32	46	19	52	21	20	31	57		19	46	5
-40		16	54	0	48	0	34	0	0	37	51	0	27	3	14	26	55	49	0	50	9	57	11		42	5		12	55	3		52	25	59	48	51	0	2	51	23	0	16	14	40		0	47	0
-39		2	41	0	26	0	31	0	15	14	43	0		23	0	16	59	2	3	4	0	51	29	29	7	0		0	55	1	27	1	7	60	30	25	1	3	59	4	6	26	0	38		32	30	0
-38	42	6	1	0	18	20	6	14	41	0	40	2		12	31	0	3	0	0	5	0	35	14	40	0	16		0		6	0	4	17	50	5	2	1	11	47	8	3	26	0	55		4	1	0
-37	17	8	1	0	8	0	0	0	1	0	0	1	0	1	21	0	8	33	1	1	0	25	0	16	2	6		0		6	12	0	3	48	12	0	2	5	52	4	16	3	14	27		2	0	13
-36	9	8	20	0	38	0	0	2	0	0	0	9	0	0	24	1	7	27	0	0	0	20	45	27	12	1	4	3		5	5	5	20	10	5	0	0	6	9	14	2	13	0	20		22	21	0
-35	1	2	9	0	3	0	15	7	37	2	3	25	3	49	0	7	0	40	13	1	0	35	5	9	4	0		8		3	13	2	6	3	26	12	1	0	21	1	10	41	0	3		19	19	0
-34	0	3	31	1	0	0	7	5	1	8	0	0	0	56	17	0	1	59	0	3	0	26	22	10	1	0		3		3	6	29	9	46	32	23	0	4	0	9	25	11	0	9		3	24	2
-33	0	5	15	1	0	0	3	6	7	0	0	0	15	47	0	0	0	49	8	11	0	51	6	17	0	3	0	3		1	2	22	24	43	13	1	3	7	0	2	0	28	5			12	12	40
-32	0	6	39	1	23	16	1	4	0	32	2	0	2	14	0	5	0	22	7	22	2	20	11	10	2	8	1	16		3	8	28	4	23	11	26	5	16	7	4	0	6	0			17	5	10
-31	0	1	21	0	13	2	0	18	8	1	2	0	20	1	0	12	0	9	0	8	9	31	16	27	3	27	0	9		29	2	5	0	0		2	2	22	31	0	7	25	0			14	0	0
-30	0	25	5	0	31	0	0	16	6	1	0	0	9	5		9	6	25	4	18	0	54	0	22	0	0	0	4		12	0	0	24	32		0	0	1	11	6	15	50				4	0	0
-29	0	10	7	0	5	0	0	5	13	2	1	0	6	48		9	0	27	21	12	0	36	18	12	0	26	0	0		0	0	0	32	22		0	3	6	15	17	0	53					0	0
-28	1	5	1	0	1	2	0	0	0	0	9	0	5	2		19	0	11	0	21	0	51	19	1	0	22	0	5		15	7	28	28	16	0	7	16	0	3	17	7	51					6	20
-27	0	20	0		9	41	6	13	2	23	4	7	23	0	16	3	1	15	8	16	0	29	39	16	0	23	0	9		7	34	19	38	23	2	0	0	0	5	7	4	55				5	1	12
-26	51	16	27		9	39	48	14	31	32	19	37	46	0	50	14	20	25	42	9	0	52	14	52	3	13	6	4		6	58	16	12	45	24	18	10	7	36	0	56	44	52			8	22	7
-25	0	14	15		7	53	55	27	57	58	46		43	27	34	39	47	14	44	7	0	38	25	58	0	28	6	1		3	60	29		58	27		3	57	18	0	58	40	60			15	17		35
-24	0	34	4		50	60	44	50	58		43		39	57		57	10	25	56	26	0	58	48	52	2		19	50		53	57	49		54	30		52	27	16	33	59	48				48	55
-23	21	41	1		40	59	52	52			52		44	46			13	60	60		9	59	60	47	5		15	58	27		57	55		55	57	37	57	51	32	45	59					57	60	58
-22	60	46	44		41	55	56	24		60	54	60	58	59	56		52	59				55	53	45	46		39	59	58		59	53		60	56	59	60	56	22	47	58		57			57	52	50	58
-21	53		60		47	32	53	46	55	58	49	60	57	45		59	58			56	60	59	58	58	59	49	57	59	52		60	56	44	39	52	47	48	38	16	47	49		53			57	46	40	59
-20	58		60		35	35	51	37	57	37	51	60	60	48		57	52		58	59		58	58	58	57	52	60	60	46		56	55	53	0		44	50	37	45	54	51		54			59		23	59
-19	49		58		50	59	56	37	57		45	59	52	49	50	57	60	56	59	45		58	60	60	58	56	51	59	57		51	53	39	7		48	54	46	56	52	50	59	54			56		0	60
-18	32	51	54		43	58		42	50		51	60	58	46	58	51	57	58	52	55	56		60	52	55	51	55	51	44		2	58	11	11	55	33	55	11	38	53	2	34	33			53	41	4	52
-17	8	51	55		29	57		3	5	0	37	60	60	0	34	3	58	56	4	52	42		57	25	58	55	59	58	53	12	9	52	13	9	23	48	17	4	45	37	6	15	5			57	53	3	14
-16	0	0	24	0	7	8	0	0	19	0	46	59	4	4	14	1	46	54	0	31	60	41	32	45	55	0	56	29	55	0	6	2	16	5	0	42	29	18	11	12	7	42	30			52	35	0	0
-15	0	0	13	0	6	7	9	10	1	3	57	54	2	2	0	13	44	43	0	27	53	39	22	59	45	7	49	16	52	0	0	0	36	9	28	32	0	2	6	7	18	13	31			14	6	0	0
-14	0	5	2	3	20	0	8	0	2	3	21	23		4	17	22	3	7	0	30	57	20	0	51	22	60	57	0		4	1	4	7	0		3	0	0	0	22	12	34	0			27	21	0	2
-13	0	0	26	0	7	0	0	5	0	2	0	3		0	19	0	1	20	0	10	22	10	12	57	2	35	42	0		0	4	0	32	6		0	6	5	1	9	14	19	0			20	0	5	0
-12	0	7	27	3	0	0	0	1	0	2	0		1	3	25	0	3	44	0	8	1	16	17	51	9	18	35	1		5	0	2	14	5		2	2	1	40	1	20	18	0			7	0	4	0
-11	0	12	23	3	0	0	0	0	7	8	1		0	2	41	9	0	6	3	3	0	10	2	38	9	35	0	0		0	0	26	14	10		0	6	0	13	7	16	18	0			11	2	2	0
-10	0	3	13	0	13	0	1	5	0	22	0		9	22	41	8	0	44	19	6	3	17	27	26	10	13	0	3		2	15	22	6	0		9	3	0	14	4	1	12	8			11	4	0	0
-9	0	3	9	0	23	8	0	21	0	10	0		25	50	15	17	29	18	58	0	16	25	39	13	0	14		0		1	38	15	20	21		11	0	0	52	13	3	23	2			9	0	24	0
-8	13	0	28	0	46	4	0	18	2	18	0		22	33	0	16	11	36	8	39	1	6	2	16	28	29		0		0	4	27	38	31		22	2	1	34	7	10	10	21			13	33	52	0
-7	10	8	10	0	57	3	0	19	6	0	2		11	0	0	17	14	45	0	8	0	28	18	17	10	15		0		12	6	23	0	12		6	0	2	30	9	0	19	0			3	1	17	0
-6	0	29	14	0	28	0	1	31	37	0	10		5	0	0	9	9	2	0	6	0	18	26	51	40	13		0		2	1	5	11	1		0	9	1	11	21	0	5	6			18	24	0	7
-5	0	2	1	16	1	2	0	16	8	32	14		16	0	0	17	0	0		3	0	30	5	54	33	1		0		8	1	24	14	30		12	2	8	26	7	13	3	0			2	38	1	0
-4	49	0	26	54	0	0	11	5	0	0	34		37	0	0	40	0	0		3	3	20	18	26	18	3	16	2		20	20	0	7	41		8	9	21	32	35	2	19	50			0	39	0	30
-3		0	19	55	2	3	0	0	11	7	49		18	17	5	3	2	2	0	16	19	28	25	52	11	56		7			52	1	31	28	3	2	32	21	40	35	0	31	2			10	45	0	12
-2		16	1	54	20	37	37	0	15	4	43		6	25		57		5	11	7	4	37	11	45	12	21	51	14			60	18	52		31	22	16	17	37	56	4	59	9			12	41	1	49
-1	20	45	23	1	42	55		38		7	26	37	51	45		31		19	39	12	0	52	3	41	38	49	29	0		0	33	2	51		1	14	40	16	8	56	21	53	35		33	23	30	0
0	50	59	58	20	45	52				27	59	59	60	53		56		11	50	15	1	53	17	49	25	55	23	24		8	44	31	49	60	38	24	60	45	45	42	58	56	57			29	52	31
1	36	18	55	57	48	50	57		52	50	40	57	48	58		52		54	57	44	33	56	58	43	22	49	22	48	40		48	58		45	27	54	50	51	1	53	60	52	56			44	58	22	58
2	53	51	57	59	56	60	56		56	60	48	60	53	59		53	59	59	59		59	57	53	59	22	53	50		55		58	59		60	28	57	56	50	20	48	57	57	57		60	58		54	54
3	56	59	56	59	42	25	55	51	55	53	53	53	60	52		52	57	56	58		58	60	59	57	49	46	50		56		55	49	50	57	41	56	59	58	54	56	48	58	59		54	58		60	57
4	58	60	53	52	48	5	55	54	43		59	59	49	45	52	56	53		52	58	59	58	59	59		49	58	60	60		49	57	55	59	49	60	59	39	50	60	58	60	56		54	60	58		47
5	57	59	58	53	51	28	45	52	59		9	55	55	47	50	53	57		58	57	51	50	56	59		52	56	48	56		27	59	44	46	51	56	60	41	59	45	60	57	58		55	60	53		60
6	12	16	52	48	54	5	22	39	58	52	10	56	60	27	37	29	55	32	59	41	31	47	59	55		30	30	23	10		3	51	27	2	45	43	22	27	48	51	35	60			58	53	51	53	24
7	2	29	0	3	14	7	16	5	4	1	44	21	5	1	17	7	6	0	15	31	0	6	25	10	25	29	0	25	10	9	3	8	14	1	0	30	0	3	8	20	27	7			13	28	14	1	0
8	3						9										52				40	41											12		7
9
10
11
12
13
14
15
16	2	4	11	2	15	0		0	0	1						0	5	4	6												45			16		11		32	52	20
17		0	2	0	0	0		10	1	7	5	2	2	10	16	16	2	0	0		0			30		36					0	10	17	16		4	24	0	5	11	11	21	16		27	4	27
18		13	18	0	3	4		0	0	0	34	0	0	0	0	6	0	3	0		5		45		10	44	53	48		2	15	58	8	8	0	21	0	0	11	0	11	16	39	0	35	0	18
19		24	9	15	1	0		0		2	17	0	0	3	0	6	7	0	0	15	7	33	1		26	22	0	3		1	0	36	10	8	1	18	28	9	29	51	39	13	53	0	53	9	23
20	13	0	2	0	3	2		0		4	0	0	0	2	29	9	20	40	10	32	7	27	4		47	30	0	18		11	5		4	0	2	28	17	13	57	9	38	7	17	3	0	18	40	39
21	0	0	14		0	2	19	0		3	6	11	10	11	4	0	8	8	3	21	1	14	3		59	60	0	6			53		16	2	21	22	28	11	35	43	60	21	60	13	4	0	37	50
22	14	0	12		17	19		9	58	16	41	0	5	11	5		44	35	19	17	4		5		53	33	0	10			53	22	39	0	52		37	7	52	56	59	21	38	0	25	0	55	60
23	1	0	15		18	51		35	57	15	40	0	0	46	28		57	38		26	7		1		59	53	1	0			54	42		0	58		24	5	40		57	50		19		28	60	52
24	18	5	13		11	60		39	58	7	60	48	14	44	42	58	6	16		60	4		17		53	21	0	35			54	50		0	57	39		18	44		57			40		34	51	56
25	37		58		31	59		27	58	15	56	15	53	51	57	59	50		59	57	0	60	54		51	9	0	58	34		48	47	60	53	50	49		13	57	53	59		60	56		53	57	56
26	52		57			60		41	60	17	57		54	59	53	54	59			60	31	58			50		7	53	49	31	49	53	46	50	23	47	59	19	56	52	42		59	58	60	59	57	60
27	57		46			28		50	51	58	58		46	40	59	43	59	60		57	54				60		11	60	48	39	57	56	30	46	45	60	57	22	59	50	57		59	49	60	50	57	59
28	57	60	48		44	50		42	51	60	50	60	56	49	60	60	60	59			58		59	51	58	60	43	58	39	47	58	55	57	27	44	58	59	56	56	58	57	59	60	52	60	54	57	60
29	57	52	42		39	28			39	50	41	58	53	55	50	55	60	56	55		55	57			55	58	54	60	53	58	46	55	41	60	53	45	58	43	56	46	38	60	60	58	54	58	52	60
30	40	56	32		56	0			25		59	58	50	16	60	40	60	54	43	57	58	60			49	50	53	60	50	39	2	51	7		30	47	54	6	55	55	15	56	41	60	59	48	55	29
31	51	46	10	54	48	4		2	0		56	52	50	59	48	11	54	32	40	42	49	54	49		52	59	56		52	41	0	60	21		15	48	57	4	11	39	21	58		49	47	59	51	58
32	49	1	20	0	58	0	0	1	0	0	60	59	58	49	9	3	52	50	0	30	52		53	60	36	53	59		57	0	1	49	0		0	39	24	0	0	16	9	39			15	57	46	53
33	0	3	57	1	37	4	8	0	0	2	37	42	0	51	21	3	38	59	22	18	44		59	56	12	58	57	60		0	1	13	8	15	0	16	0	0	0	14	3	53			0	31	36	17
34	4	2	59	0	13	1	2	0	1	0	38	0	3	0	32	1	11	51	5	4	15		40	56	15		46	24			2	0	19	8	15	20	4	0	0	6	10	40	16	59	8	25	39	0
35	0	6	58	1	7	0	1	2	0	11	19	0	0	1	4	0	1	10	14	8	31		6	58	4		52	0			0	4	23	28	0	3	7	0	0	1	7		14	55	0	1	0	0
36	0	6		0	21	0		5	1	12	21	0	11	26	0	2	8	0	0	0	0		0	59	15		56	7		34	5	0	0	15	22		0	3	22	0	12		30	57	5	4	26	0
37	0	1		1	7	0		0	0	0	22	0	0	51	0	0	8		4	6	5		3	59	16		41	22		4	8	1	0	40	0		0	2	13	0	0	47		22	3	26	28	12
38		5		9	13	0		7	0	0	35	1	0	59	0	1	18		0	1	10		0	57	11		0	0		0	3	1	3	21	0		0	5	0	0	9	46		4	53	59	29	0
39		5		0	46	5		0	2	0	45	10	0	36	5	0	2	16	0	13	4		0	31	29		10	0		14	0	0	2	15	1		3		0	0	10	30	2	25	51	59	0	0
40		15	10	0	30	0	1	0	8	0	55		0	29	13	3	8	49	0	28	0		12	40	52		1	0		8	0	6	1	37	30		4		4	17	1	50	0	41	2	49	4	0
41		4	15	0	6	2	0	4	0	0	58		0	22	21	0	15	8	0	2	1		1	44	58		0	1		16	0	2	29	53	10		0		19	0	0	32	0	12	0	21	26	0
42		19	13	0		0	0	0	0	38	56		0	26	0	3	2	3	7	7	16		23	34	25		24	14		19	0	0	0	30	6		0		7	1	3	40	0	0	0	28	45	0
43		0	35	0			5	0	0	3	41	0	0	0	0	6	5	20	2	6	4		0	49	2		25	1		0	6		19	15	6	0	32		46	18	1	25	3	15	3	3	38	0
44		0	9	0			2	0	1	8	23	2	0	18	8	33	0	19	0	16	7	38	35	40	10		12	6		18	5		20	40	4	8	32		3	0	0	41	5	11	0	4	46	0
45		0	11	0	54		16	2	0	0	19	0	0	11	0	15	0	25	0	3	1	32	12	42	25		26	9		0	33	13	29	34		26	21		4	0	19	38	17	10	8	10	45	1
46		0	15	0	27			2	48	23	42	5	4	0	1	20	4	7	4	13	10	38	9	47	14		8	25		19	51	12	45			6	44		0	0	29	44	28	3	33	39	53	48
47		0	4	7	12	15		4	53	57	36			4	28	50	2	35	13	0	1	30	4	51	49		26	5		14	59	12	48			40	30		27	0	52	39	52	0	59	24	58	58
48	58	0	4	42	21	28	54	0	28	59	32			42	20	58	11		60	21	1	53	18	51	59		13	13		0	51	4	41	58		30			50	2	58		59	0	59	10	60
49	53	0	24		32	58	39	53	53	60	26	60	60	57	35	49	36		59	28	0	57	60	60	47		36	20	5	0		1	60	59		23			60	1	57		58	0	60	42	53
50	42	14	53		46	60	5	53	49	59	56	49	48	51	53	45	55	59	59	25	36	60		41	55	29	41	60	15	8		41	51			55			55		57		53	0	59	59	59
51	56		58	59	57	59	38	49	51	60	56	51	59	49	57	51	50	59	47	53		60		41	54	60	41	60	59	15		53	58			54	60		54		53	58	53	0	51	55	60	59
52	59		57	49	50	55	55	54	60	60	54	58	53	49	52	58	55	59	53	60		59	48	59	58	57	55	54	50	14	47	55	55	10		56	49		56	53	51	59	58	3		57	54	59
53	56	44	52	43	59	60	54	46	56		52		58	56	52	50	56	58	58	58	57	60	48		53	58	57	49	47	55	44	58	42	11	52	51	54		60	55	51	59	50	7		51	55	58
54	49	0	48	17	49	3	53		50		55		52	47	48	30	59	58	55	51	51	57	58	58	60	54	51	60	58	58	32	55	46	11	51	53	54		52	52	24	32	10	49	2	32	58	46
55	16	0	49	0	48	0	58	34	57	9	56	59	60	34	56	11	56	30	12	60	45	59	58	59	48		48	60	42	50	23	55	26	1	9	51	51		58	56	24	29	0	58	0	9	41	3
56	0	0	30	0	40	0	1	0	11	0	43	19	45	0	0	3	49		0	57	45	54	7	60	21		58	52	52	57	3	49	23	2	0	53	24		59	57	14	5	6	57	0	46	44	5
57	0	0	0	0	29	2	0	2	2	7	60	0	46	23	1	8	39		0	45	10		0		7	49	56	25		40	1	27	48	4	1	53	33		57	59	2	11	2	47	0	46	49	0
58	27	0	22	0	0	1	0	0	12	5	32	0	49	20	1	3	33	56	0	21	0		1		34		55	20		45	12	41	18	10	6	13	7		33	49	24	19	0	56	0	22	10	0
59	7	18	16	0	0	3	5	0	2	0	13	0	10	18	3	3	8	6	0	23	0		20	56	33		52	0		11	14	6	2	9	0	0	59		3	1	12	14	2	37	0	8	0	0
60	0	32	0	0	7	2	4	0	0	0	31	7	1	1	0	5	0	11	8	36	0		28	15	17		37	1		24	4	0	0	28	4	0	28		18	1	12	6	0	2	1	31	7	0
61	0	0	3	0	0	9	2	0	0	0	47	0	1	10	1	0	13	12	1	15	0		19	14	26		16	5		0	0	31	8	32	1	1	18		40		3	6	0	23	3	10	45	5
62	22		0	1	1	12	14	22	3	9		1	6	3	0	7	8	35	3	18	2		8	1	21		11	0		6	1	1	7	24	5	13	3		12		10	35	9	0	0	16	27	23
63	32		2	0	0	1	7	12	1	1		0	1	7	12	0	0	12	0	24	7		2	3	24	46	28	0		2	29	11	3	27	0	18	0		9		3	23	0	5	0	13	29	0
64	43		5	0	1	7	0	24	13	0	51	0	30	0	12	2	0	0	0	0	2		0	2	34	53	3	51		0	9	4	0	36	0	20	6		6	2	5	28	5	18	0	11	4	0
65	9		19	0	4	0	7	23	28	0	31	0	41	6	0	2	0	0	7		12		1	6	26	60		11		1	0	0	0	7	0	4	59		4	5	17	21	9	54		13	0	1
66	0		0	0	20	0	3	8	20	0	7	0	10	19	7	6	6	1	4		9		36	41	9	60				0	0	0	11	9	0	2	40		0	2	0	9	8	3		4	0	0
67	4		8	0	22	0	5	0	38		4	1	0		0	30	1	12	6		19	57	0	58	9	60				0	0	0	10	7	13	0	0		3	4	16	17	0	4		10	16	3
68	1		5	32	0	13	4	27	35		16	0	0		3	46	8	15	16		9	26	7	54	23		0			0	0	7	0	19	9	6	14		0	0	6	49	0	4		4	36	0
69	11		6	10	14	18	29	29	35	3	0	0	3		14	28	15	18	22		0	31	11	46	30		11			0	6	0	17	42	3	0	9		6	0	1	53	0	1		5	39	25
70	32	44	6	16	12	53	22	2	25	0	7	0	7		19	15	16	4	24		0	60	28	59	15	41	16			0	40	0	53	38	28	0	11		32	0	5	59	0	6		30	38	42
71	33		16	27	3	59	32	1	32	0	30	4	25	21	0	49	32	2	51		4	43	17	51	26	25	6				55	0	27	49	8	0	48		25	0	56	41	5	0		19	17	60
72	37		7	57	0	59	60		17	3	26	3	44	35	10	57	57	42	60		5	59	58	20	26	44	16		13		47	5	42	59	37	0	29		44	2	59	53		36	60	32	47	58
73	37		8	60	0	25	53		40	23	57		54	55	59	48	59	8	60		0	60	60	46	59	60	12		6	19	57	30	57	58	49	0	59		48	1	58			29	60	56	51	49
74	54		7	50	41	21	58	48	59	29	44		52	54	60	48	58	52	60		2	60	60	10	58	54	3		22	51	58	34	59	54	50	19	40		56	52	60			48	59	40	53	57
75	57		2	59		43	56	43	60	8	38	58	54	50	59	50	50		58		7	60	58	30	57	44	42		41	31	55	58	48		60	56				59	56	60	56	52	57	52	57	57
76			15	56		53	51	55	49	58	56	58	57	48	45	53	53		54		31	58	53		57	49	59		60	49	59	60	56		56	59	57				45	59	60		60	55	54	58
77			20	49	47	55	49	50	58		47	57	60	56	53	51	52	56	60	53			54		59	41	56		46	55	58	49	44	58	59	49	47		60		27	56	52		59	59	52	52
78	55		11	10	40	55	30	55	60		33	49	51	53	55	15	45	57	58	59		51	56	59	55		51		55	30	57	55	47	59	36	54	49		58		31	23	6	60	8	57	42	27
79	29		16	0	46	59	8	49	56	48	56	43	52	25		24	56	18	30	55		56	39	59	46		55			18	11	56	42	55	16	50	51		50	56	38	35	22	51	0	47	47	0
80	7		38	0	53	33	21	38	58	0	54	60	57	0		1	22	32	0	45	40	53	33	57	53		58			37	37	59	20	41	0	55	39		59	57	31	2	0	60	0	19	40	3
81	3		42	0	33	17	30	22	34	0	51	55	48	1		0		43	0	19	16		0	60	8		59			2	9	57	0	47	0	27	4		58	59	0	3	0	58	0	34	44	0
82	4		1	0	6	0	0	0	16	8	49	48	58	9		0		12	0	5	5		7	55	4		51			3	7		23	19	1	9	27		53	49	0	17	0	1	3	15	10	0
83	10		0	0	9	8	14	1	14	11	53	20	21	0		0	3	19	0	37	4		4	51	0		51			0	0		18	32	3	2	33		14	1	1	8	0	0	2	21	0	0
84	17		0	2	0	0	29	0	0	4	25	14	1	17		0	0	32	0	21	5		11	57	0		39			3	9	41	16	23	4	1	9		14	1	0	49	0		3	21	4	0
85	59		1	5	0	9	23	3	0	16	28	11	0	0		0	0	34	0	17	0		2	49	0					7	35	0	2	5	8	23	60		9	40	4	21	0		0	19	18	5
86	39		0	0	0	0	24	5	3	2	19	27	6	14		0	0	9	15	18	0		29	37	0					3	29	0	1	0	0	3			44	60	12	12	21	1	1	23	2	0
87	0		0	0	34	6	0	0	5	1	41	16	27	1		0	0	0	15	5	2		38	8	0		0			0	6	0	8	6	0	20			19	27	3	24	2	1	0	16	0	0
88	0		0	3	35	0	6	4	0	5	23	8	17	1		0	0	19	4	34	16		7	2	6		0			0	0	0	0	27	4	14	50		0	2	0	24	0	40	5	9	0	0
89	8		1	1	1	0	0	0	2	14	0	14	27	1		6	12	11	0	30	2		17	14	4		3			3	0	4	0	35	28	9	19		0	5	4	9	14	56	3	5	1	0
90	0	54	1	0	0	30	0	0	6	20	0	2	18		3	6	16	14		21	0		22	11	0		19		60	0	0	6	28	21	1	19	1		31	2	2	29	8	0		10	3	0
91	0	9	7	0	0	10	0	0	0	1	4	0	44		0	7	0	4		25	13		12	20	0		0		60	7	22	3	0	58	21	0	32		45	4	5		0	0		32	0	0
92	0	1	2	15	1	52	0	1		2	10	0	35	50	0	6	6	24		0	3		11	18	0		0		57	12	59	0	1	51	18	6	0		13	0	0		28	0		0	0	0
93	0	0	13	0	0	40	0	3		0	23	6	24		0	19	1	17		14	0		0	10	5		7			8	55	0	11	17	14	5	8		0	0	48	50		0		0	0	1
94	28	0	28	0	19	48	0	7		0	7	27	8		22	31		3		23	0	40	18	12	3		17				54	14	2	34	0	6	3		2	0	2	59		5		5	28	54
95	47	26	58	8	3	59	5	52		0	6	18	6		59	10		19		19	0	43	33	17	2		0		33		58	11	55	32	15	4	41		33	0	1	28		3		15	41	60
[truncated: 11 more columns]
